# Supplementary material for: Nanostructure-assisted charge transfer in α-Fe2O3/g-C3N4 heterojunctions for efficient and highly stable photoelectrochemical water splitting
Source: Royal Society of Chemistry journal article supplement (doi:10.1039/d0dt00683a), 2020-01-01
Supplement: d0dt00683a1.pdf [file d0dt00683a1.pdf]

## Electronic Supplementary Information

# Nanostructure-Assisted Charge Transfer in $\alpha$ -Fe<sub>2</sub>O<sub>3</sub>/g-C<sub>3</sub>N<sub>4</sub> Heterojunctions for Efficient and Highly Stable Photoelectrochemical Water Splitting

Nurul Affiqah Arzaee<sup>a\*</sup>, Mohamad Firdaus Mohamad Noh<sup>a</sup>, Nur Suraya Haziqah Mohd Ita<sup>b</sup>,  
Nurul Aida Mohamed<sup>a</sup>, Siti Nur Farhana Mohd Nasir<sup>a</sup>, Inzamam Nawas Nawas Mumthas<sup>a</sup>,  
Aznan Fazli Ismail<sup>b,c\*</sup>, Mohd Asri Mat Teridi<sup>a\*</sup>

<sup>a</sup>*Solar Energy Research Institute, Universiti Kebangsaan Malaysia, 43600 Bangi, Selangor, Malaysia.*

<sup>b</sup>*Centre for Frontier Science, Faculty of Science and Technology, Universiti Kebangsaan Malaysia, 43600 Bangi, Selangor, Malaysia.*

<sup>c</sup>*Nuclear Science Program, Faculty of Science and Technology, Universiti Kebangsaan Malaysia, 43600 UKM Bangi, Selangor, Malaysia.*

\*Corresponding author: affiqaharzaee@gmail.com (N.A. Arzaee) Phone: +603-89118580

\*Corresponding author: aznan@ukm.edu.my (A.F. Ismail) Phone: +603-89213919

\*Corresponding author: asri@ukm.edu.my (M.A.M. Teridi) Phone: +603-89118580

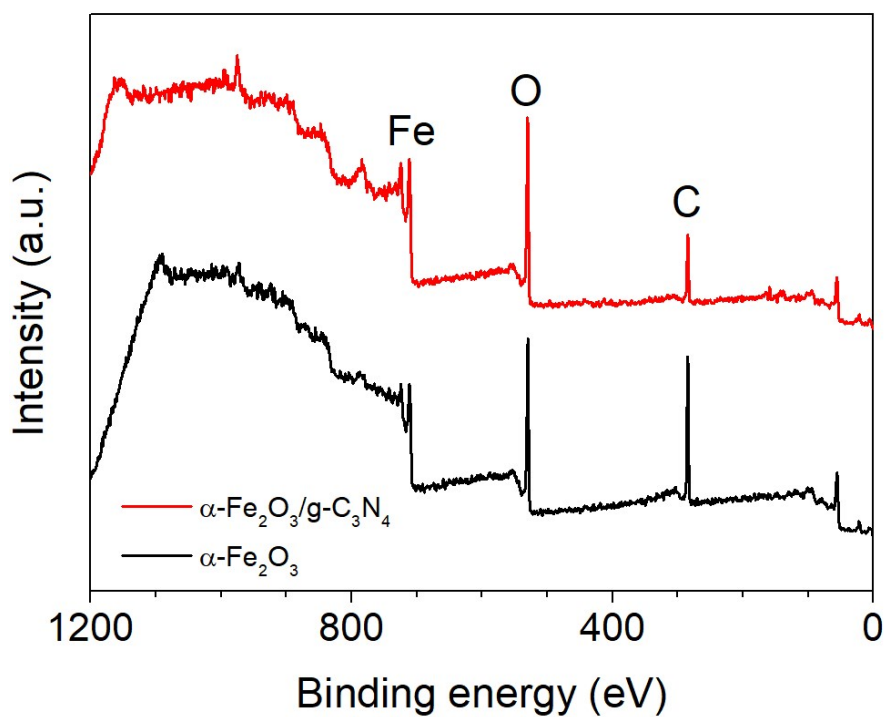

**Fig. S1** XPS survey spectra of  $\alpha\text{-Fe}_2\text{O}_3$  and  $\alpha\text{-Fe}_2\text{O}_3/\text{g-C}_3\text{N}_4$  thin films.

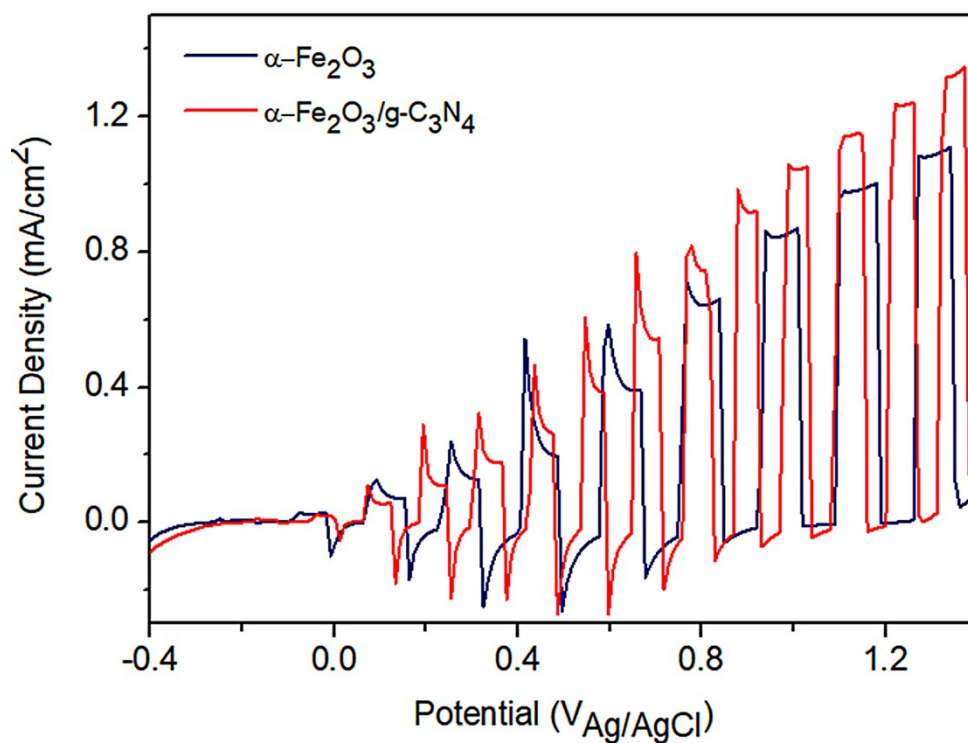

**Fig. S2** Photocurrent density-voltage (J-V) curves of  $\alpha\text{-Fe}_2\text{O}_3$  and  $\alpha\text{-Fe}_2\text{O}_3/\text{g-C}_3\text{N}_4$  photoanodes under chopped condition.

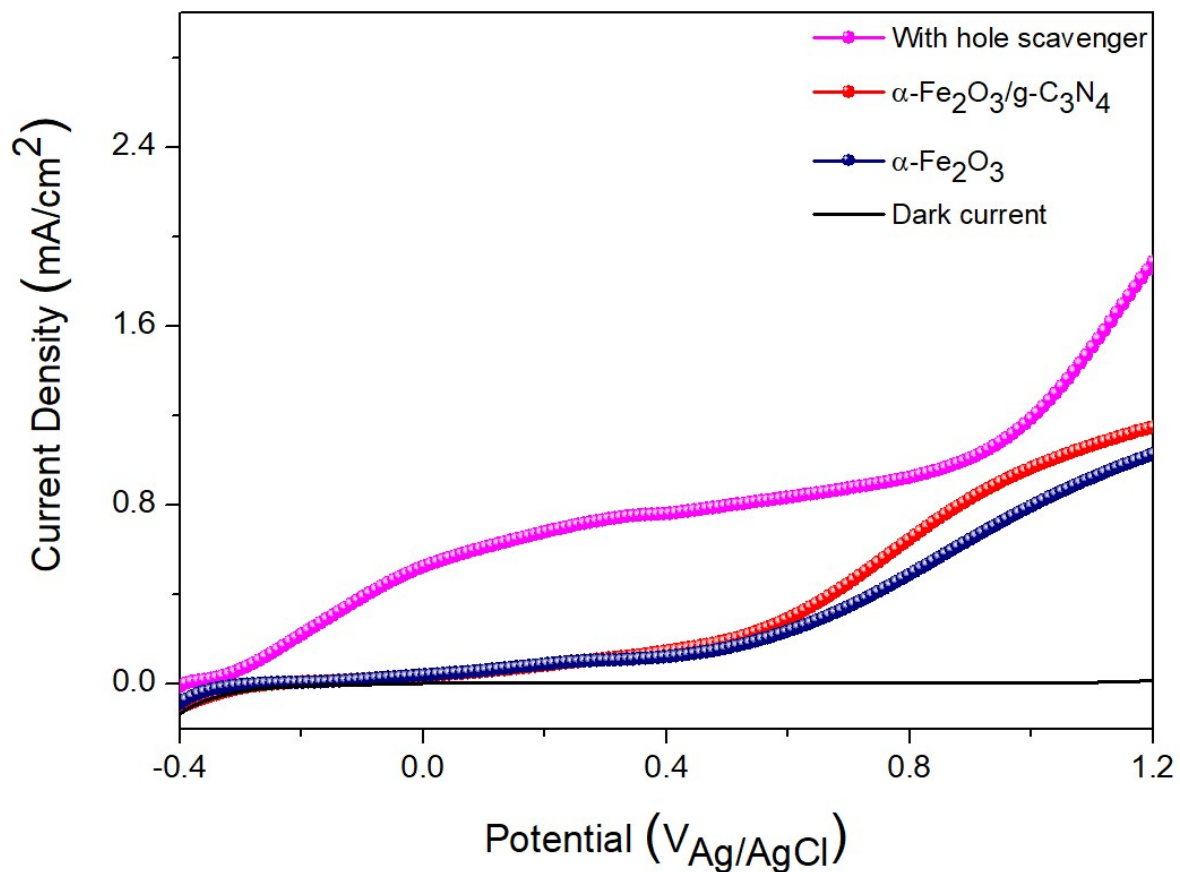

**Fig. S3** Photocurrent density-voltage (J-V) curves of  $\alpha$ -Fe<sub>2</sub>O<sub>3</sub> and  $\alpha$ -Fe<sub>2</sub>O<sub>3</sub>/g-C<sub>3</sub>N<sub>4</sub> photoanodes with and without Na<sub>2</sub>SO<sub>3</sub> hole scavenger.

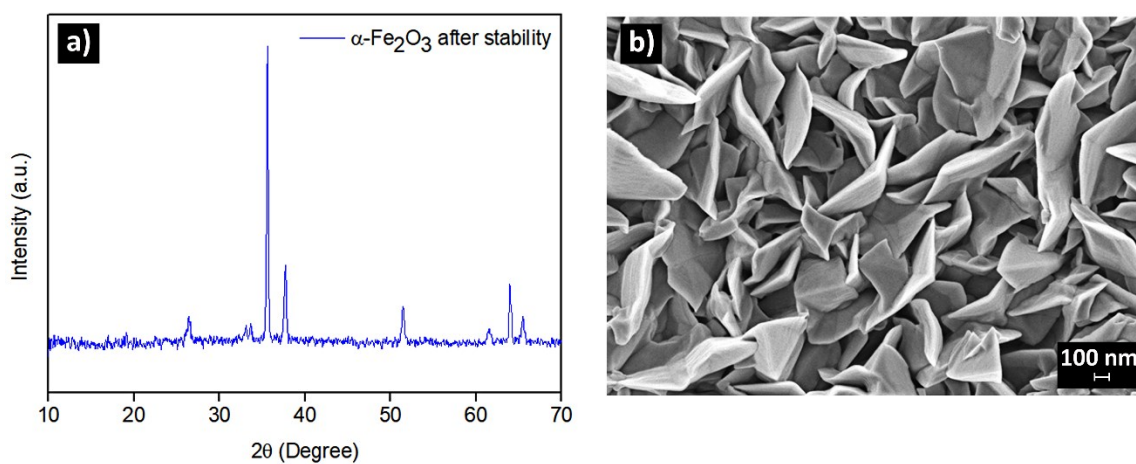

**Fig. S4** a) XRD patterns and b) top view FESEM images of  $\alpha$ -Fe<sub>2</sub>O<sub>3</sub> photoanode after 12h stability test.

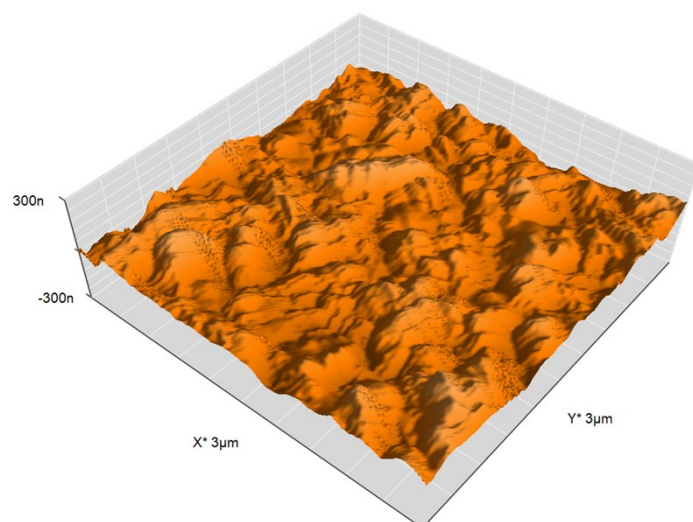

**Fig. S5** 3-dimensional view of AFM image of smooth  $\alpha\text{-Fe}_2\text{O}_3$  photoanode

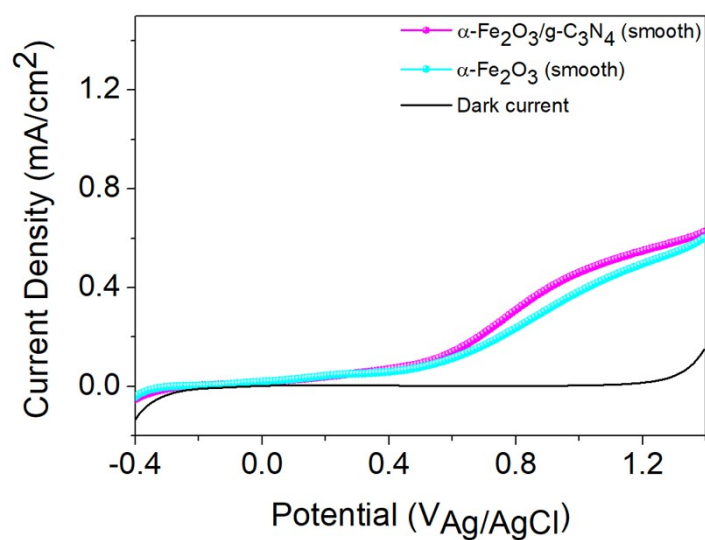

**Fig. S6** Photocurrent density-voltage (J-V) curves of smooth  $\alpha\text{-Fe}_2\text{O}_3$  and  $\alpha\text{-Fe}_2\text{O}_3/\text{g-C}_3\text{N}_4$  photoanodes

**Table S1** O and Fe atomic ratio evaluated from the XPS data of survey spectra.

| Sample   | $\alpha\text{-Fe}_2\text{O}_3$ | $\alpha\text{-Fe}_2\text{O}_3/\text{g-C}_3\text{N}_4$ |
|----------|--------------------------------|-------------------------------------------------------|
| O (at%)  | 58.1                           | 59.3                                                  |
| Fe (at%) | 41.9                           | 40.7                                                  |
| O/Fe     | 1.387                          | 1.457                                                 |
